# Supplementary material for: No sex differences in adult telomere length across vertebrates: a meta-analysis
Source: PubMed Central journal article supplement (PMC7735339; doi:10.1098/rsos.200548), 2020-11-11

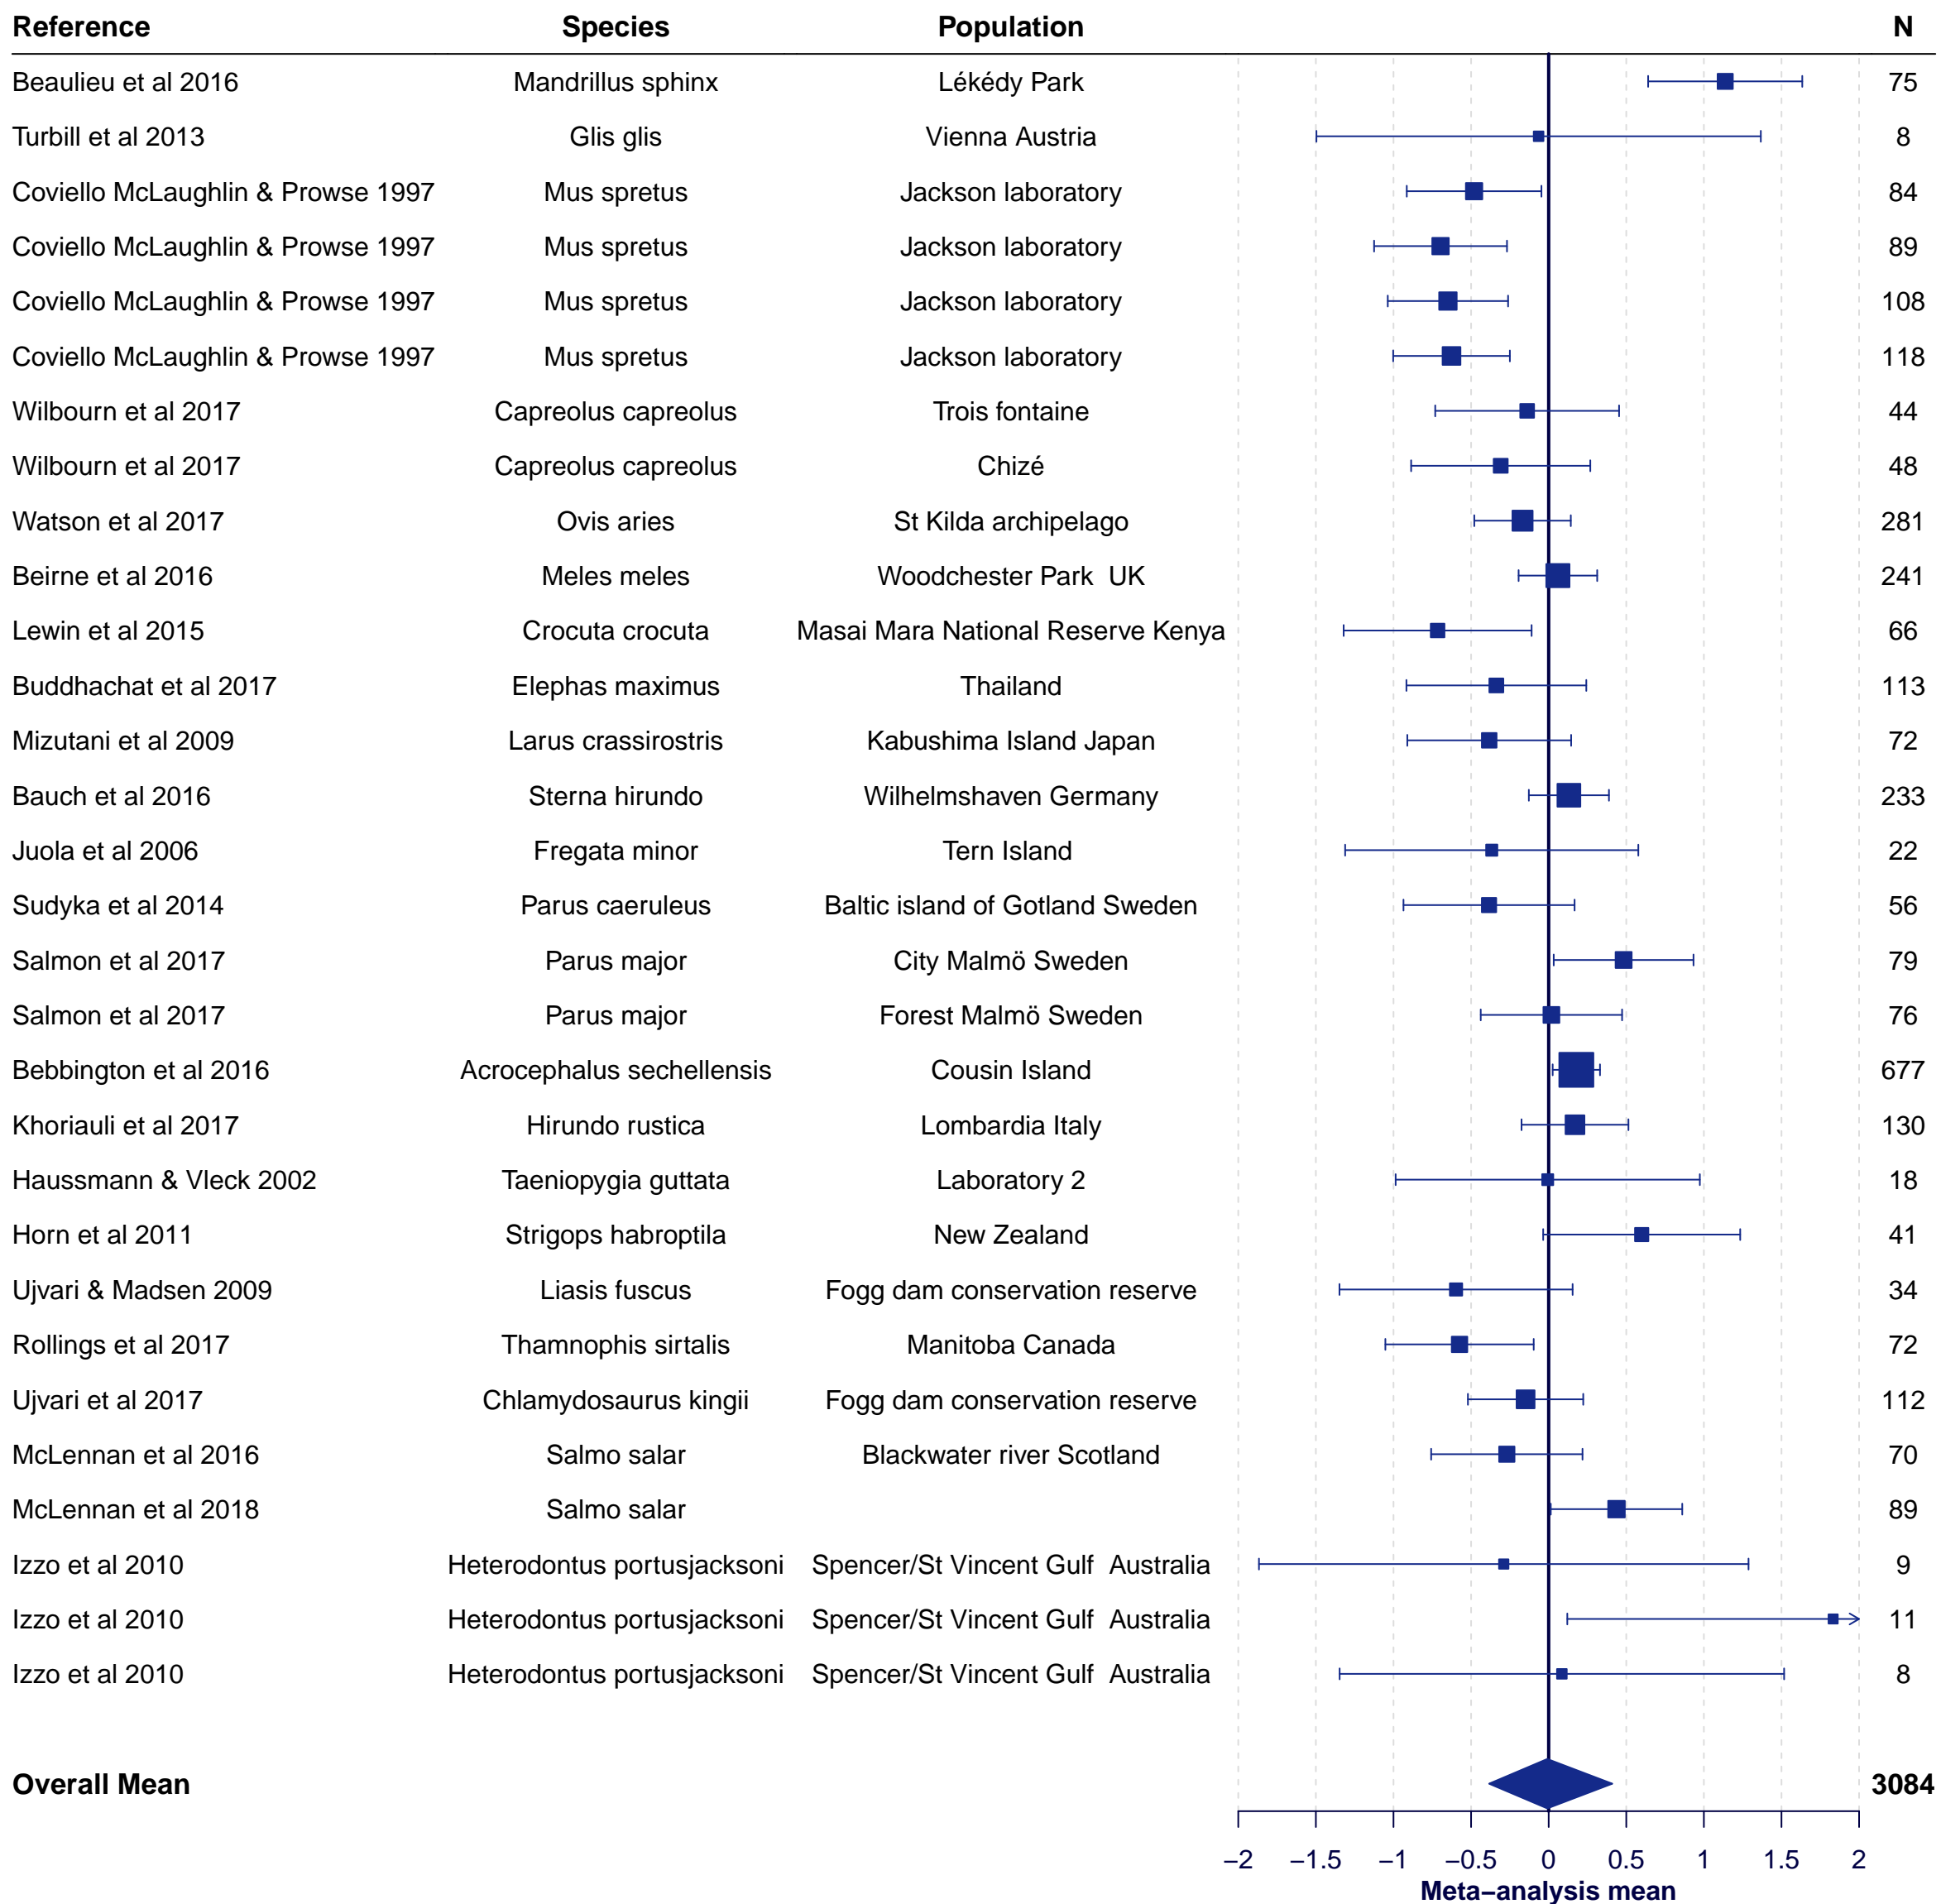

Supplement: rsos200548supp6.pdf [file rsos200548supp6.pdf]
